# Supplementary material for: ATP depletion during mitotic arrest induces mitotic slippage and APC/CCdh1-dependent cyclin B1 degradation
Source: PubMed Central journal article supplement — Exp Mol Med. 2018 Apr 27;50(4):46. doi: 10.1038/s12276-018-0069-2 (PMC5938023; doi:10.1038/s12276-018-0069-2), 2018-04-27
Supplement: 12276_2018_69_MOESM1_ESM.pdf [file 12276_2018_69_MOESM1_ESM.pdf]

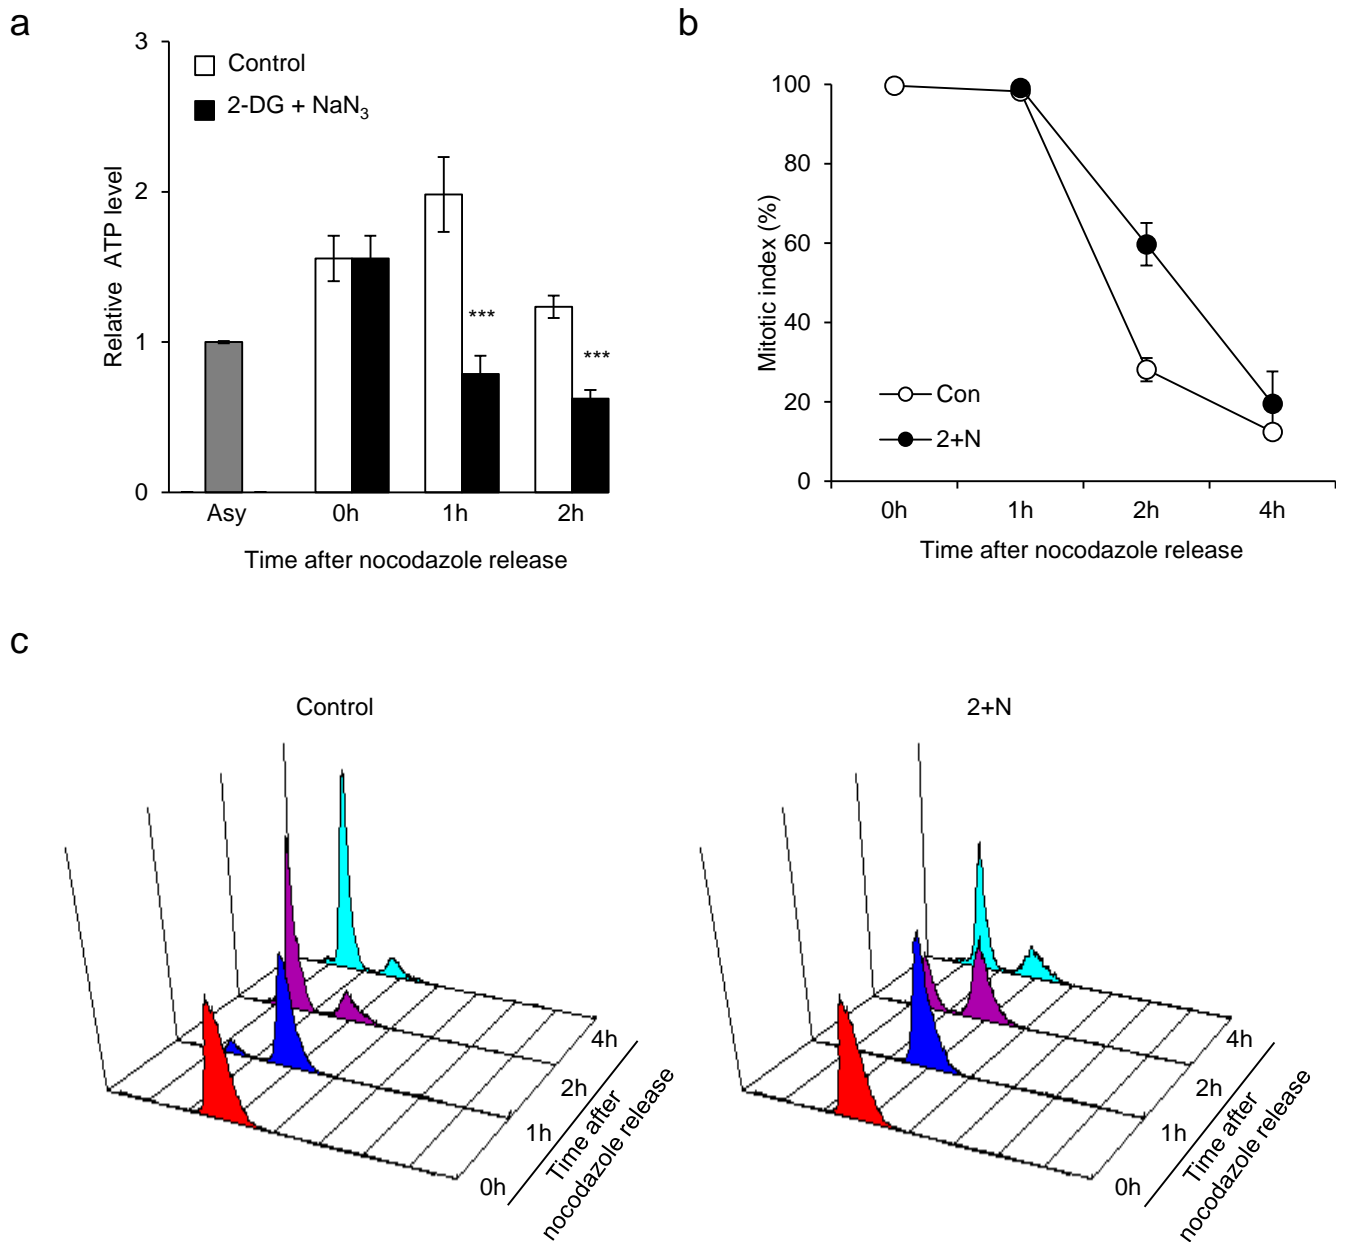

**Supplementary Figure 1.** Effect of ATP depletion on mitotic progression. (a) Cells were treated with /without 2-DG and NaN<sub>3</sub> at the start of releasing from nocodazole-induced mitotic arrest (100ng/ml, 16h). Relative ATP levels of cells were measured at the indicated time points after the release. Results are given as the mean  $\pm$  SD from three independent experiments. \*\*\* $P$ <0.001 by Student's  $t$ -test (b) Mitotic cell percentage were measured by aceto-orcein staining. Mean $\pm$  SD from two independent experiments (n=100). (c) DNA FACS analysis of the samples as in (b).

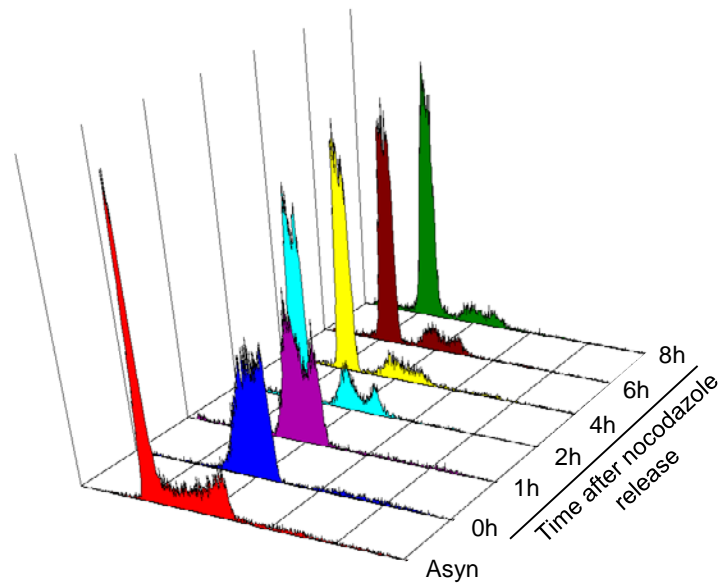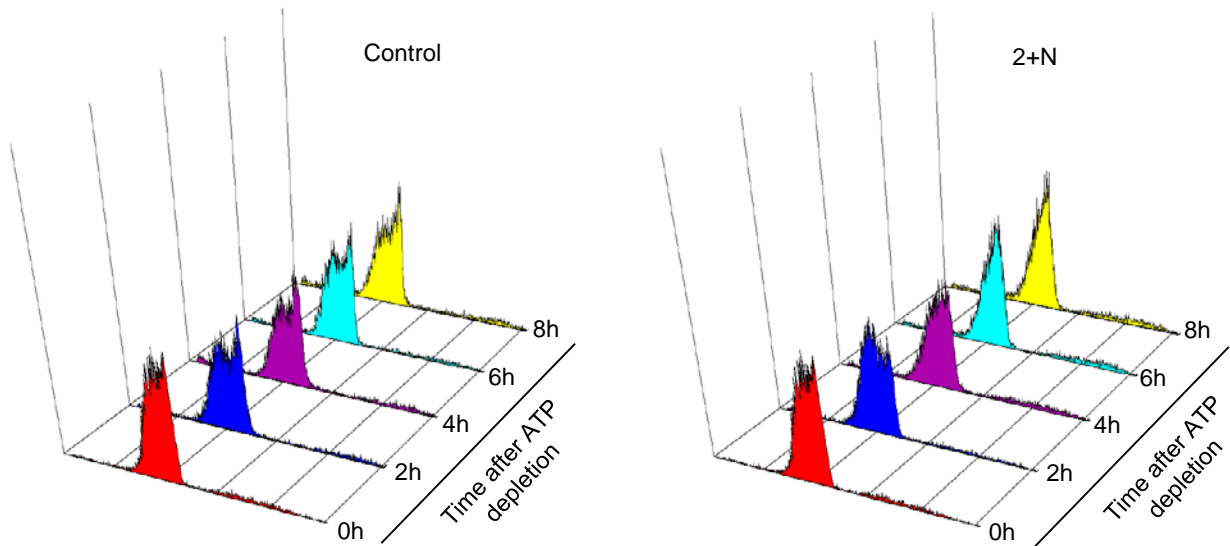

**Supplementary Figure 2.** Persistence of 4N population when the mitotic cells decreased. Cells arrested in mitosis for 16h by nocodazole treatment were released (upper panel) or not released (lower panel), and treated with/without 2-DG and NaN<sub>3</sub> (2+N). Cell cycle was monitored via DNA FACS analysis.

**a**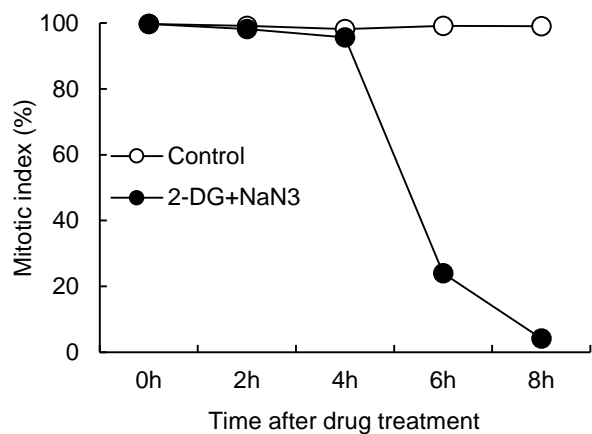**b**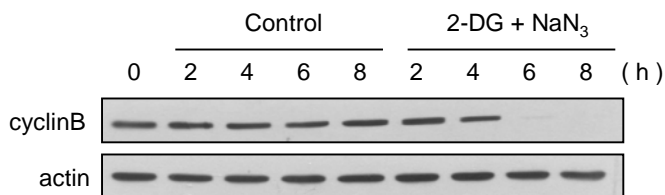

**Supplementary Figure 3.** Mitotic slippage by ATP depletion in Taxol-induced mitotic arrest. (a) Cells incubated with 1 $\mu$ M taxol for 16h were treated with/without 2-DG and NaN<sub>3</sub>. Mitotic cell percentage were measured by aceto-orcein staining. Mean $\pm$  SD from two independent experiments (n=100). (B) Cell lysates from (A) were subjected to western blot analysis using indicated antibodies.

a

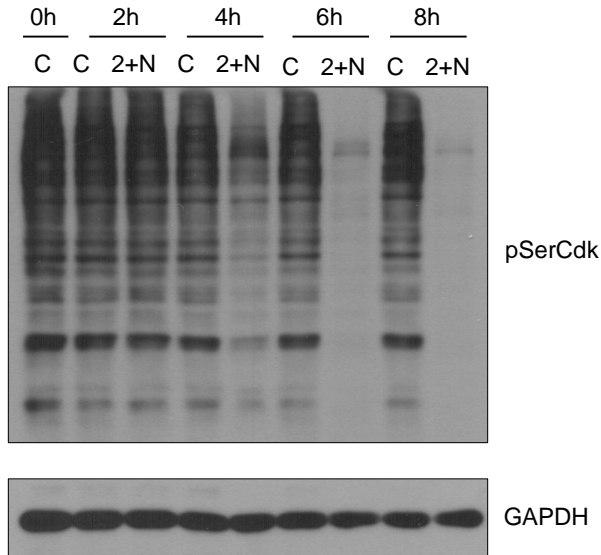

b

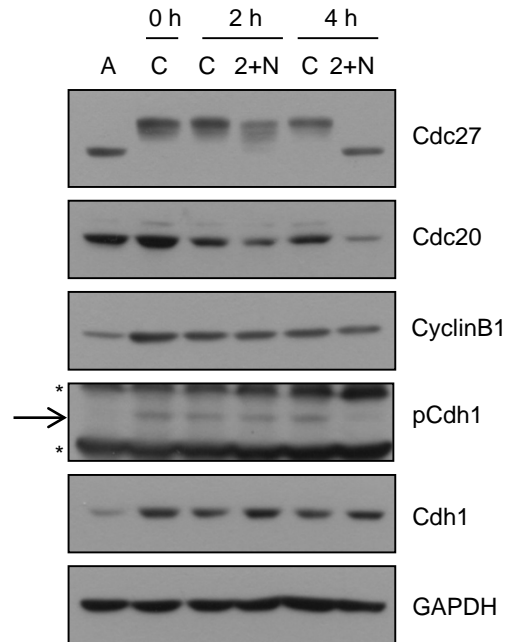

**Supplementary Figure 4.** Changes in phosphorylation status of global Cdk1 substrate proteins, and of Cdh1 and CDC27. Mitotic arrested cells by nocodazole treatment for 16h were further treated with/without 2-DG and NaN<sub>3</sub> (2+N) for the indicated times. (a) Mitotic cell lysates were subjected to Western blot analysis by using Rabbit monoclonal antibody mixture to phospho-Cdk substrate motif[(K/H)pSP] (pSerCdk). (b) Asynchronous (A) and mitotic cell lysates were subjected to Western blot analysis using indicated antibodies \*, non-specific band.

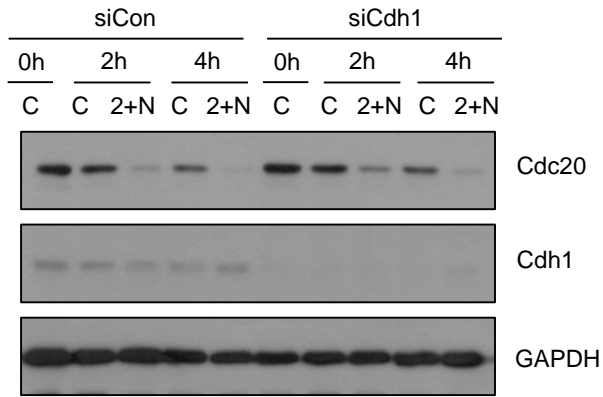

**Supplementary Figure 5.** Knockdown of Cdh1 could not abrogate the decrease of Cdc20 protein. HeLa cells were transfected with indicated SiRNAs, and then arrested at mitosis by treatment with nocodazole for 16 h. These cells were further treated with/without 2-DG and  $\text{NaN}_3$  (2+N) for the indicated times. Mitotic cell lysates were subjected to Western blot analysis by using indicated antibodies.
